# Supplementary material for: Utility of plasma circulating tumor DNA and tumor DNA profiles in head and neck squamous cell carcinoma
Source: PubMed Central journal article supplement (PMC9167274; doi:10.1038/s41598-022-13417-5), 2022-06-04
Supplement: 41598_2022_13417_MOESM1_ESM.pdf [file 41598_2022_13417_MOESM1_ESM.pdf]

**Table S1. Patient clinical data and detected ctDNA**

| Case | site           | gender | BI   | T  | N  | M | Stage | HPV      | Local recurrence | Distant metastasis | Plasma Before treatment | Follow Plasma |
|------|----------------|--------|------|----|----|---|-------|----------|------------------|--------------------|-------------------------|---------------|
|      |                |        |      |    |    |   |       |          |                  |                    | Detection               | Detection     |
| 1    | Oropharyngeal  | Male   | 1260 | 1  | 0  | 0 | I     | Negative | +                | -                  | -                       | -             |
| 2    | Oropharyngeal  | Male   | 0    | 2  | 1  | 0 | I     | Positive | -                | -                  | -                       | -             |
| 3    | Oropharyngeal  | Male   | 500  | 2  | 1  | 0 | I     | Positive | -                | -                  | +                       | -             |
| 4    | Oropharyngeal  | Female | 0    | 2  | 0  | 0 | I     | Positive | -                | -                  | +                       | -             |
| 5    | Oropharyngeal  | Male   | 480  | 2  | 1  | 0 | I     | Positive | -                | -                  | +                       | -             |
| 6    | Oropharyngeal  | Male   | 150  | 2  | 1  | 0 | I     | Positive | -                | --                 | -                       | -             |
| 7    | Oropharyngeal  | Male   | 400  | 2  | 0  | 0 | I     | Positive | -                | -                  | -                       | -             |
| 8    | Oropharyngeal  | Male   | 600  | 2  | 1  | 0 | I     | Positive | -                | -                  | -                       | -             |
| 9    | Oropharyngeal  | Male   | 530  | 2  | 0  | 0 | II    | Negative | -                | -                  | -                       | -             |
| 10   | Oropharyngeal  | Male   | 400  | 3  | 0  | 0 | III   | Negative | +                | +                  | +                       | +             |
| 11   | Oropharyngeal  | Male   | 400  | 4  | 2  | 0 | III   | Positive | -                | -                  | -                       | -             |
| 12   | Oropharyngeal  | Female | 200  | 4  | 2  | 0 | III   | Positive | -                | -                  | +                       | -             |
| 13   | Oropharyngeal  | Male   | 800  | 4  | 1  | 0 | III   | Positive | -                | -                  | +                       | -             |
| 14   | Oropharyngeal  | Male   | 780  | 4a | 2  | 0 | III   | Positive | +                | -                  | -                       | -             |
| 15   | Oral           | Female | 0    | 3  | 1  | 0 | III   | Unknown  | +                | -                  | -                       | +             |
| 16   | Oropharyngeal  | Male   | 600  | 2  | 2b | 0 | IVa   | Negative | -                | -                  | +                       | -             |
| 17   | Oropharyngeal  | Female | 0    | 4a | 3b | 0 | IVb   | Negative | +                | +                  | +                       | +             |
| 18   | Hypopharyngeal | Male   | 675  | 2  | 2b | 0 | IVa   | Unknown  | -                | +                  | +                       | +             |
| 19   | Hypopharyngeal | Male   | 345  | 4a | 2b | 0 | IVa   | Unknown  | +                | +                  | -                       | +             |
| 20   | Hypopharyngeal | Male   | 1000 | 3  | 2b | 0 | IVa   | Unknown  | -                | -                  | +                       | -             |

BI = Brinkman Index; T = tumor; N = lymph nodes; M = metastasis; Stage = Stage (UICC 8<sup>th</sup>); HPV = Human Papillomavirus

**Table S2. HNSCC Targeted NGS panel**

|         |        |        |        |         |         |        |        |        |        |
|---------|--------|--------|--------|---------|---------|--------|--------|--------|--------|
| ADGRA2  | AGO    | ATR    | BCL6   | BIRC3   | CASP8   | CCND1  | CDKN2A | CDKN2B | CREBBP |
| DCUN1D1 | EGFR   | EIF4A2 | EP300  | ETV5    | EXT1    | FAT1   | FAT4   | FBXW7  | FGF3   |
| FGF4    | FGF12  | FGF19  | FGFR1  | FOXL2   | GMPS    | GRM3   | HRAS   | KLHL6  | KMT2C  |
| KMT2D   | LPP    | LRP1B  | LRRK2  | MAP3K13 | MECOM   | MGAM   | MTAC   | MYC    | NDRG2  |
| NFE2L2  | NOTCH1 | NSD3   | NUMA1  | PC      | PCLO    | PIK3CA | PIK3CB | PRKCI  | PRKDC  |
| RAD21   | RECQL4 | RELN   | RNF213 | ROS1    | RPS6KB2 | SDHA   | SOX2   | SPEN   | STAG1  |
| TBL1XR1 | TERC   | TERT   | TFRC   | TP53    | TP63    | TRIP13 | WWTR1  | YAP1   | ZNF703 |
| INPPL1  |        |        |        |         |         |        |        |        |        |

The panel for this study consisted of 71 oncogene exons from the International Cancer Genome Consortium (ICGC) Data Portal that were found to have somatic mutations and copy number changes of 5% or more in head and neck cancers.

## Supplementary figure: Somatic mutation in tumor tissue

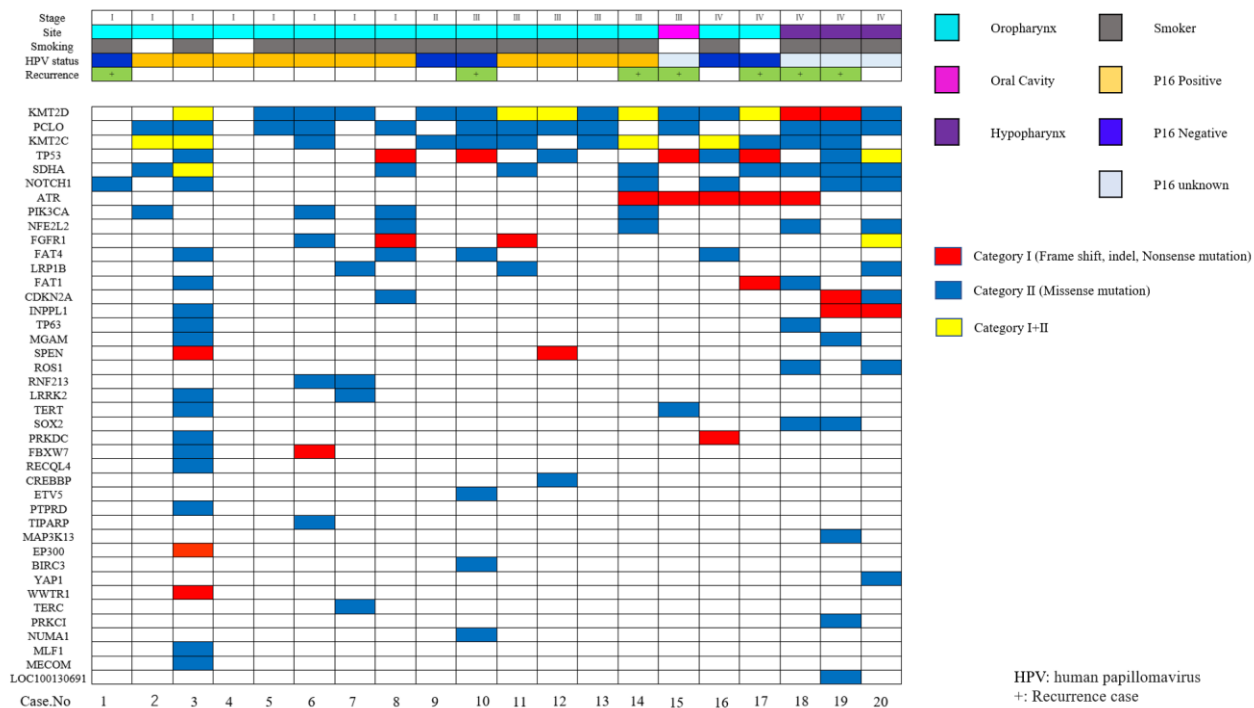

The results of mutation profiling in 20 tumor tissue samples, divided into Category I (frame shift, indel, and nonsense mutations) and Category II (missense mutation) according to the type of gene mutation. Results are shown with the clinical background of the tumor. The upper panel shows clinical backgrounds for each lesion, including tumor stage and location, human *papillomavirus* (HPV) status, and recurrence after treatment. The lower panel shows the result of the mutation pattern of each mutated gene in each tissue. Genes with somatic mutations in this study are shown on the left. Red cells, Category I mutation; blue cells, Category II mutations; yellow cells, both Category I and II mutations.
